# Supplementary material for: Strategies for the prevention of perinatal hepatitis B transmission in a marginalized population on the Thailand-Myanmar border: a cost-effectiveness analysis
Source: Springer Nature journal article supplement (doi:10.1186/s12879-017-2660-x), 2017-08-09

**A**

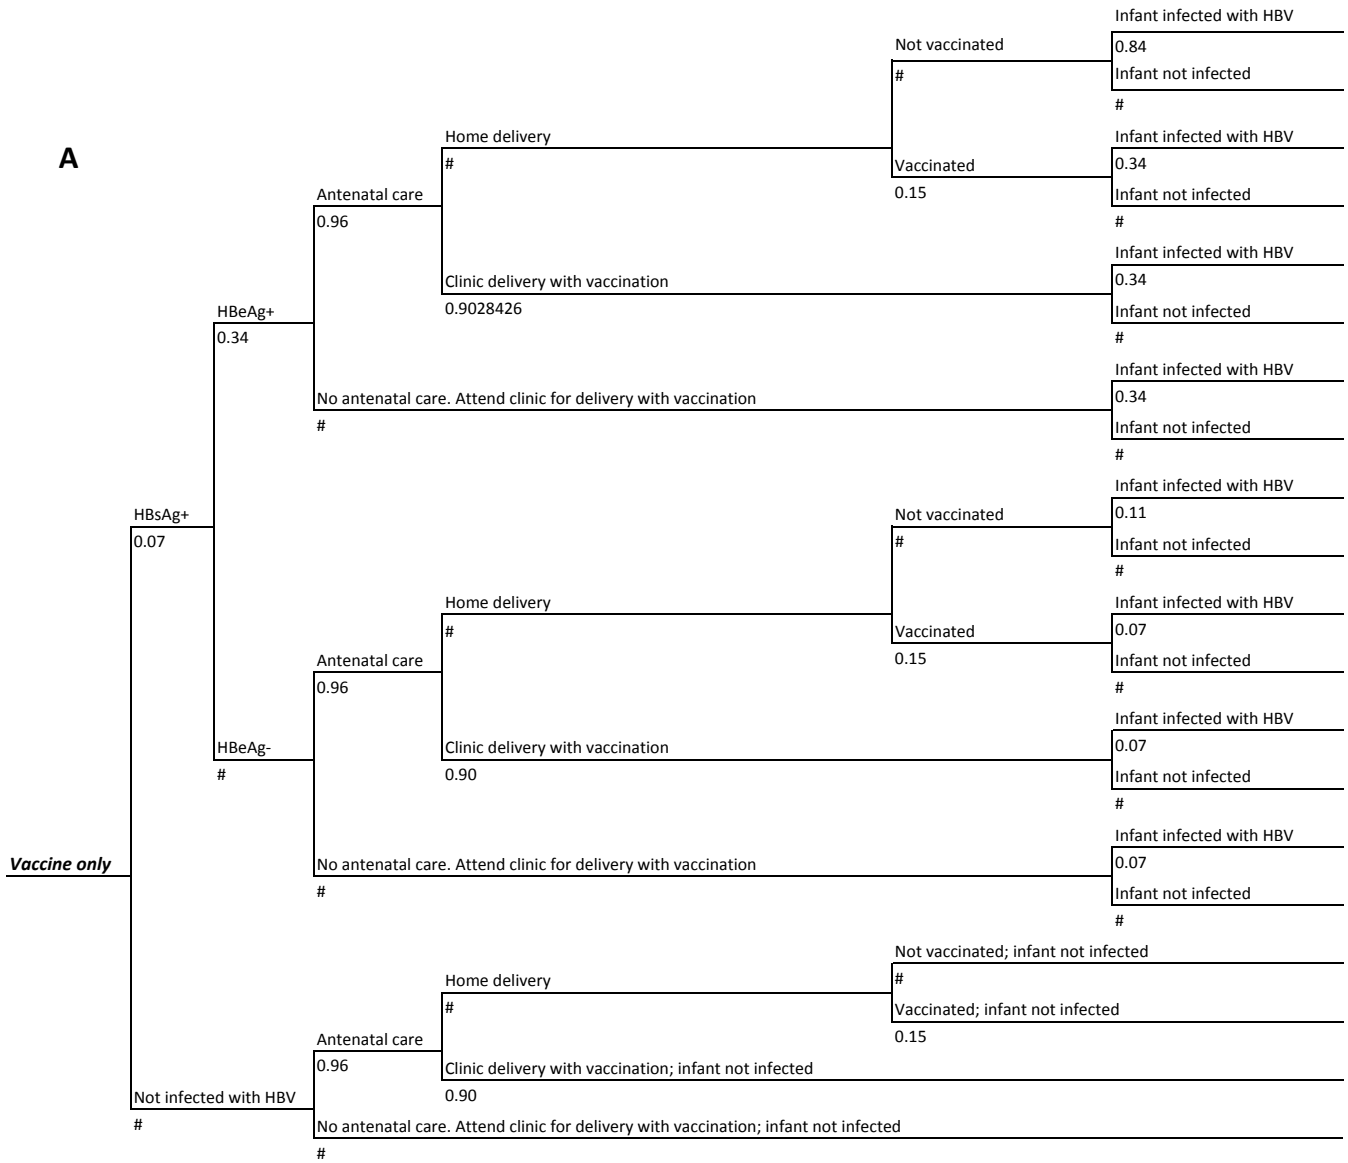

**B**

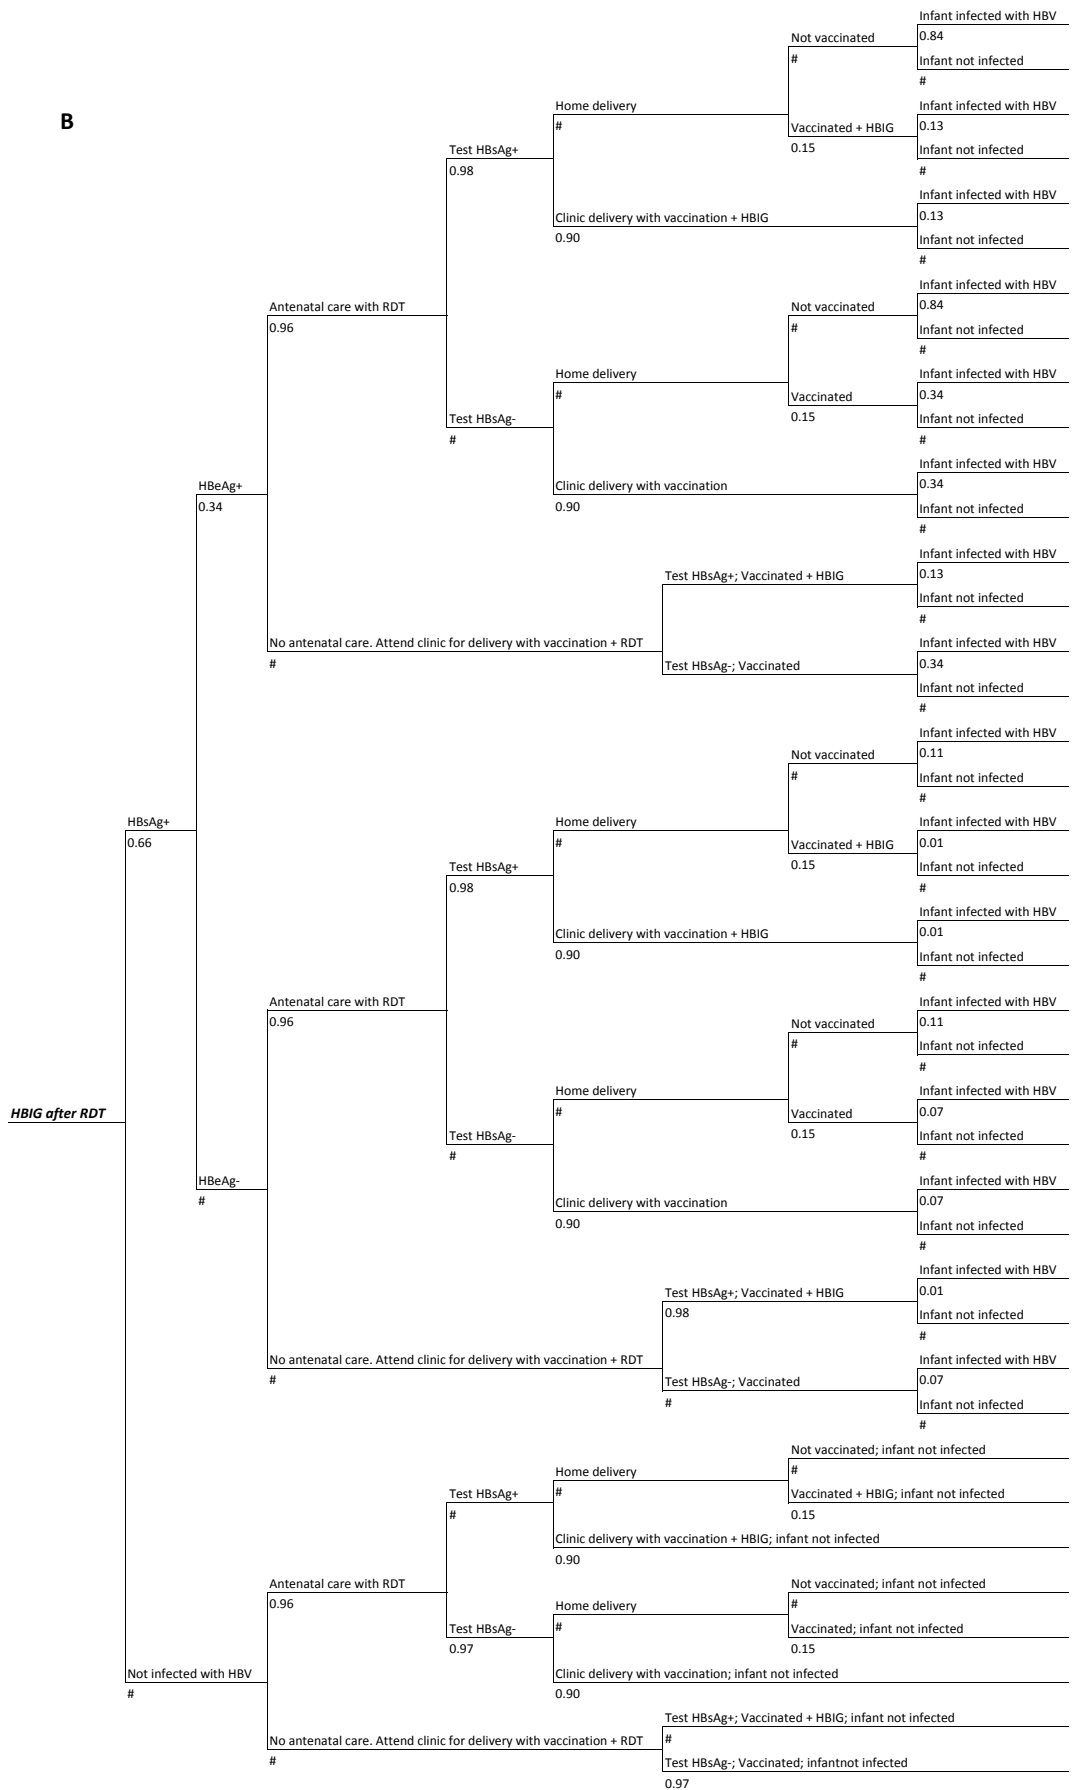

C

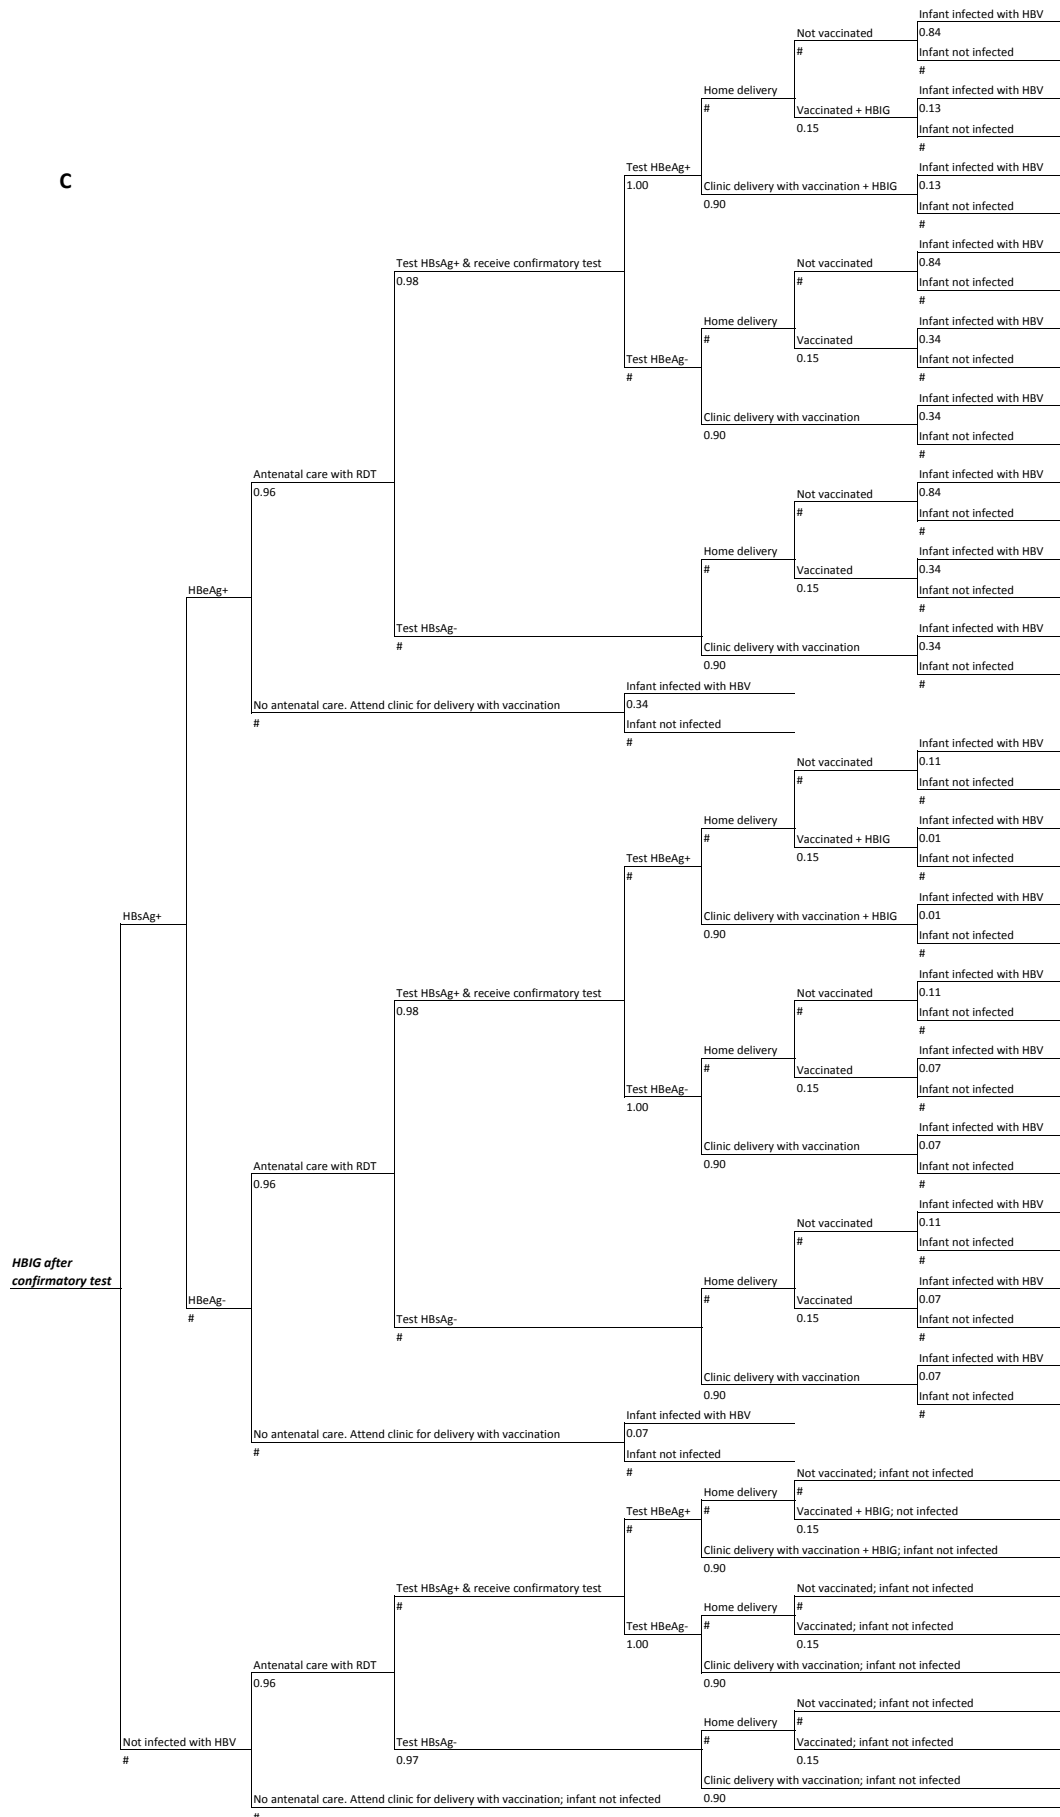

Supplement: MOESM1 [file 13448702]
